# Supplementary material for: Analog-sensitive cell line identifies cellular substrates of CDK9
Source: PubMed Central journal article supplement (PMC6916755; doi:10.18632/oncotarget.27334), 2019-12-10
Supplement: oncotarget-10-6934-s001.pdf [file oncotarget-10-6934-s001.pdf]

## Analog-sensitive cell line identifies cellular substrates of CDK9

### SUPPLEMENTARY MATERIALS

*Note:* The mass spectrometry proteomics data and the data supplement have been deposited to the ProteomeXchange Consortium via the PRIDE [1] partner repository with the dataset identifier PXD014825 at <https://www.ebi.ac.uk/pride/archive/>.

Eisenacher M, Pérez E, Uszkoreit J, Pfeuffer J, et al. The PRIDE database and related tools and resources in 2019: improving support for quantification data. *Nucleic Acids Res.* 2019; 47:D442–D450. <https://doi.org/10.1093/nar/gky1106>. [PubMed]

### REFERENCES

- Perez-Riverol Y, Csordas A, Bai J, Bernal-Llinares M, Hewapathirana S, Kundu DJ, Inuganti A, Griss J, Mayer G,

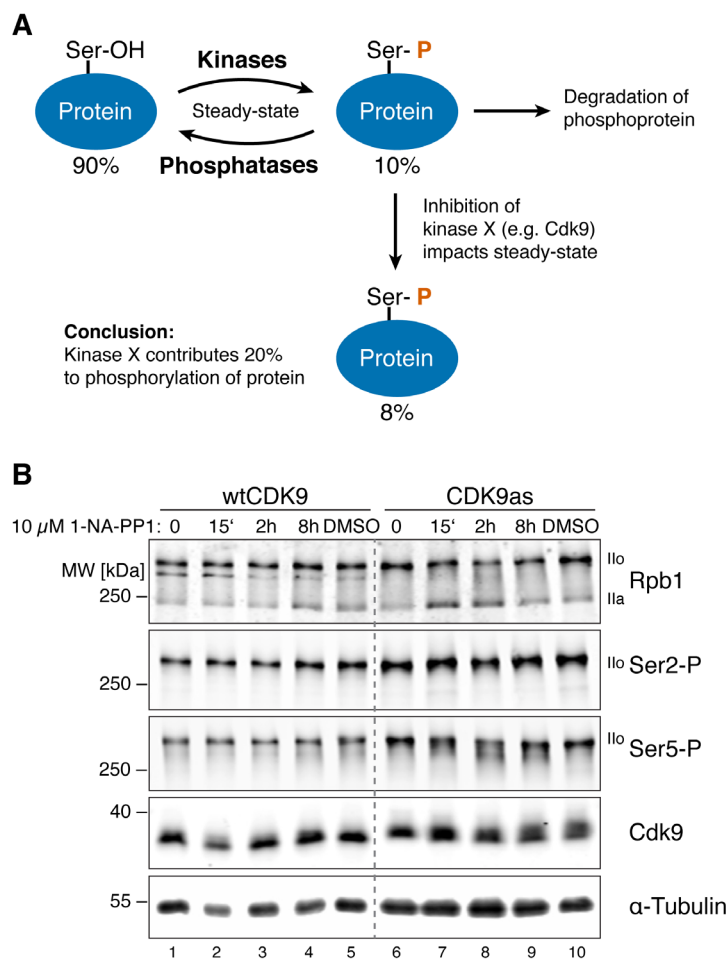

**Supplementary Figure 1:** (A) Kinases and phosphatases determine the steady-state of a given protein phosphorylation. Inhibition of a specific kinase and subsequent quantitation of the change in protein phosphorylation describes the contribution of the inhibited kinase to the steady-state. (B) Inhibition of CDK9as with 1-NA-PP1 reduces CTD phosphorylation signals. Wildtype (wt) CDK9 and CDK9as cells were treated with 10  $\mu$ M 1-NA-PP1 for 15 min, 2 h, and 8 h. Untreated and 8 h DMSO-treated cells were used as controls. Phosphorylation levels of Pol II CTD were assessed by western blot using antibodies against Pol II large subunit Rpb1, CTD phosphorylated at Ser2 and Ser5. Cdk9 and  $\alpha$ -Tubulin served as loading control.

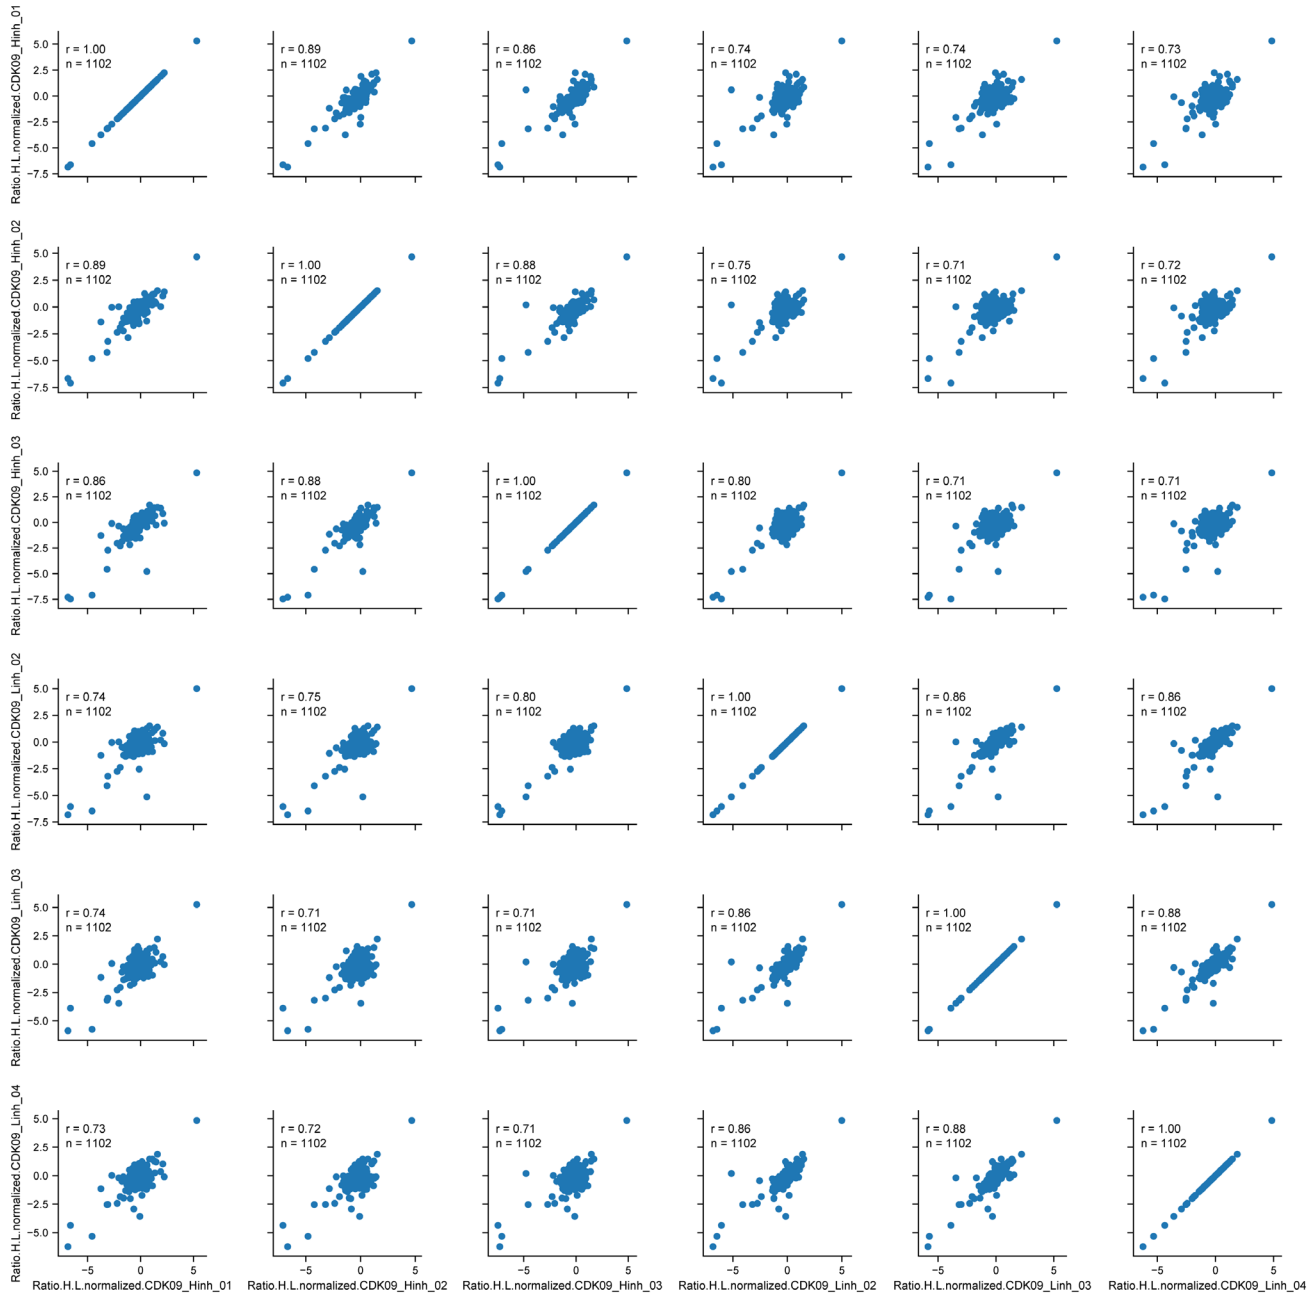

**Supplementary Figure 2: Correlation of 1NA-PP1/DMSO ratios among all replicates was determined (r = Spearman correlation coefficient).**

**A**

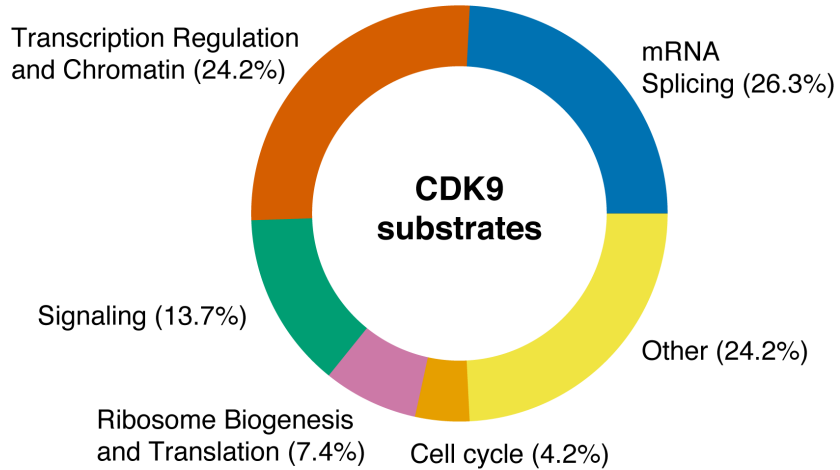

**B**

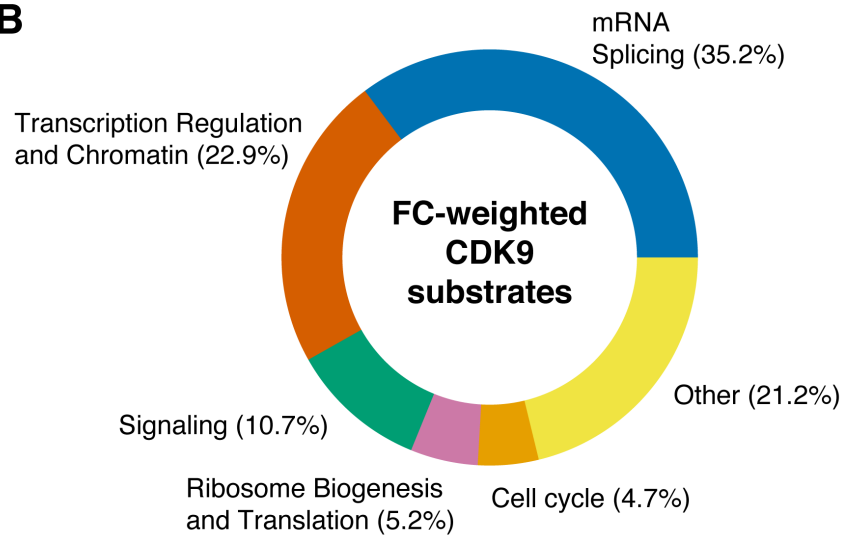

**Supplementary Figure 3:** Gene ontology analysis: (A) Based on number of substrates in each functional category. (B) Weighted gene ontology analysis, based on summed fold-change (FC) values of all substrates within one functional category.

**Supplementary Table 1: Top 30 increased CDK9 substrates, ranked by log<sub>2</sub>(fold-change)**

| Name     | Uniprot | Phosphosite      | Log <sub>2</sub> (FC) | P-value  |
|----------|---------|------------------|-----------------------|----------|
| LEO1     | Q8WVC0  | S273, S277, S279 | 0.76                  | 6.17E-05 |
| LEO1     | Q8WVC0  | S277, S279       | 0.76                  | 6.17E-05 |
| RCSD1    | Q6JBY9  | S105, S108       | 0.76                  | 0.0031   |
| PPP1R9B  | Q96SB3  | S100             | 0.69                  | 2.91E-07 |
| MAPK14   | E7EX54  | T103, Y105       | 0.64                  | 7.14E-05 |
| PARN     | O95453  | S557             | 0.64                  | 8.04E-05 |
| DENND4A  | Q7Z401  | S1194            | 0.59                  | 8.51E-05 |
| DENND4A  | Q7Z401  | S1194, T1197     | 0.59                  | 8.51E-05 |
| EEF2     | P13639  | T57, T59         | 0.59                  | 0.0124   |
| WASF2    | Q9Y6W5  | S293, S296       | 0.58                  | 0.000644 |
| WASF2    | Q9Y6W5  | S296             | 0.58                  | 0.000644 |
| KLC1     | Q07866  | S521, S524       | 0.51                  | 0.000996 |
| UBXN7    | C9JAT7  | S118, S126       | 0.5                   | 1.88E-05 |
| TBC1D10B | Q4KMP7  | S687, S707       | 0.5                   | 0.0019   |
| LRMP     | F5H006  | T266, S269       | 0.48                  | 0.00641  |
| MCRIP2   | Q9BUT9  | S82              | 0.47                  | 0.000227 |
| SRSF5    | Q13243  | S250             | 0.46                  | 0.000958 |
| RCSD1    | Q6JBY9  | S68              | 0.45                  | 0.000676 |
| UBXN7    | C9JAT7  | S118, S126       | 0.45                  | 0.00207  |
| BCLAF1   | E9PK09  | S264, S268       | 0.42                  | 3.66E-06 |
| PNN      | Q9H307  | S66              | 0.42                  | 0.0222   |
| LSM14A   | Q8ND56  | S178, S183       | 0.4                   | 0.0048   |
| SASH3    | O75995  | S38, S42         | 0.39                  | 2.16E-05 |
| SASH3    | O75995  | S38, S42         | 0.39                  | 2.16E-05 |
| STK4     | F5H5B4  | S355             | 0.37                  | 0.00495  |
| MYO9B    | M0R300  | S1267, T1271     | 0.35                  | 0.00336  |
| SCAMP3   | O14828  | S32              | 0.35                  | 0.0116   |
| CEP170   | Q5SW79  | S356, S359       | 0.34                  | 0.00129  |
| ARFGEF2  | Q9Y6D5  | S1511            | 0.33                  | 0.00111  |
| YBX3     | P16989  |                  | 0.33                  | 0.0469   |
